# Supplementary material for: Endoplasmic reticulum stress in adipose tissue augments lipolysis
Source: PubMed Central journal article supplement (PMC4288352; doi:10.1111/jcmm.12384), 2014-11-08
Supplement: jcmm0019-0082-sd2.pdf [file jcmm0019-0082-sd2.pdf]

# Supplementary Figure 2

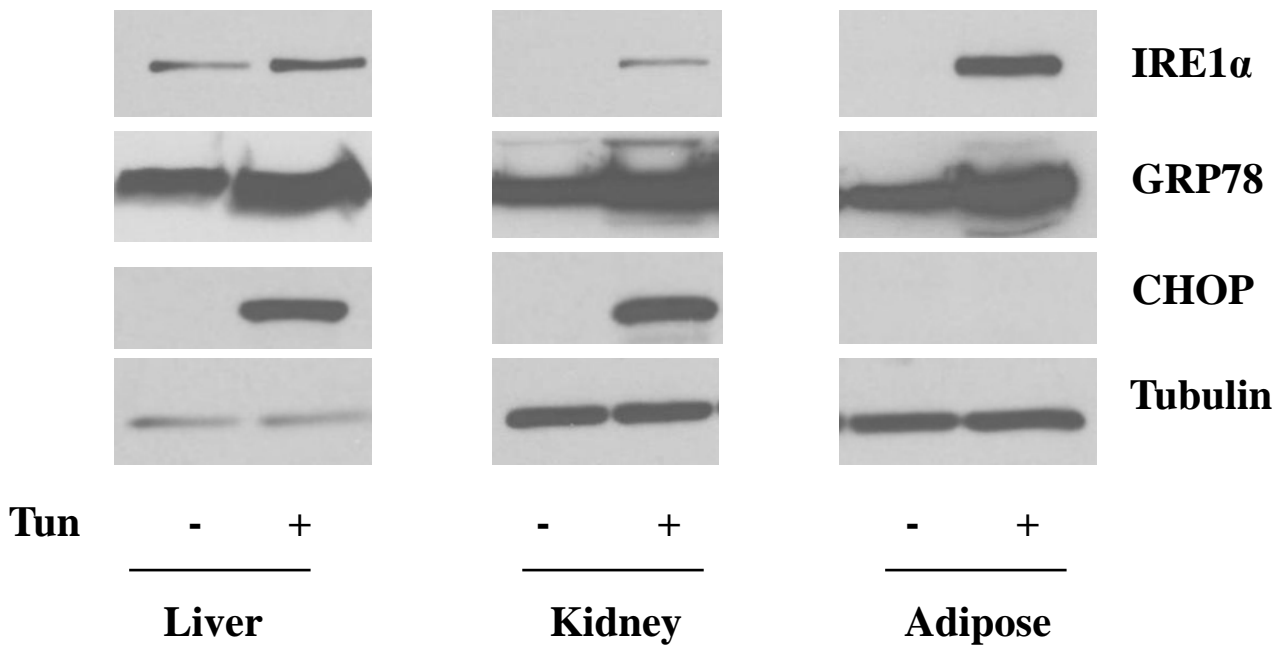

**Supplementary Figure 2:** Mice were injected with tunicamycin and after 24 h, the liver, kidney and epididymal fat pads were dissected and homogenized. Equal amounts of protein were resolved by SDS-PAGE and immunoblotted using antibodies recognizing IRE1 $\alpha$ , GRP78, CHOP or alpha/beta tubulin. Proteins were visualized using enhanced chemiluminescence and imaged on the BioRad ChemiDoc MP Imaging System.
