# Supplementary material for: Endoplasmic reticulum stress in adipose tissue augments lipolysis
Source: PubMed Central journal article supplement (PMC4288352; doi:10.1111/jcmm.12384), 2014-11-08
Supplement: jcmm0019-0082-sd3.pdf [file jcmm0019-0082-sd3.pdf]

# Supplementary Figure 3

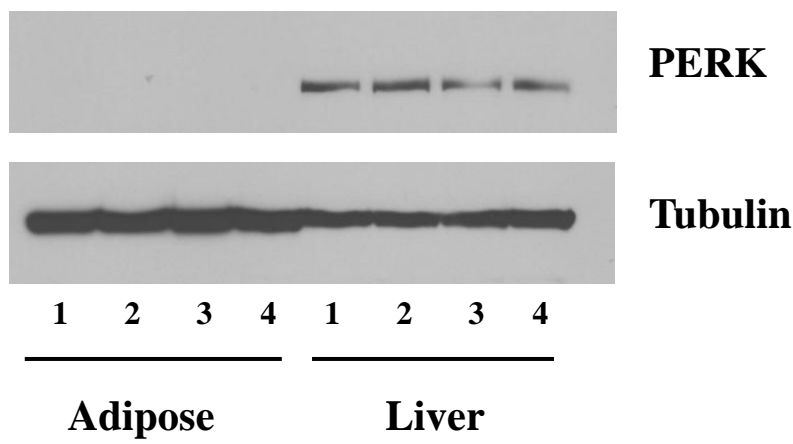

**Supplementary Figure 3:** Epididymal fat pads and liver tissue were obtained from four mice (#1-4) and homogenized. Equal amounts of protein were resolved by SDS-PAGE and immunoblotted using antibodies recognizing either PERK (Santa Cruz, H-300) or alpha/beta tubulin (Cell Signaling). Proteins were visualized using enhanced chemiluminescence.
