# Supplementary material for: Endoplasmic reticulum stress in adipose tissue augments lipolysis
Source: PubMed Central journal article supplement (PMC4288352; doi:10.1111/jcmm.12384), 2014-11-08
Supplement: jcmm0019-0082-sd4.pdf [file jcmm0019-0082-sd4.pdf]

# Supplementary Figure 4

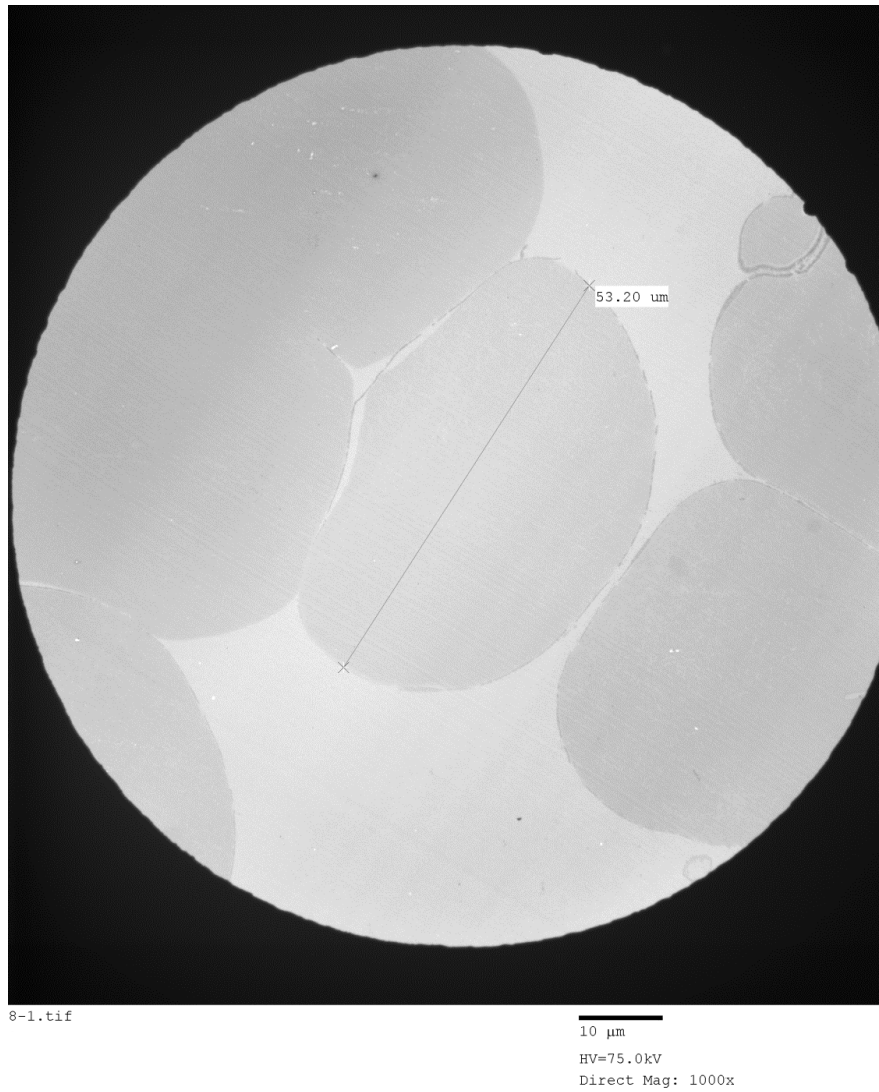

**Supplementary Figure 4:** Representative electron micrograph of adipocytes within the epididymal fat pads. The diameter of the lipid droplet is shown. Scale bar = 10 $\mu\text{m}$ .
