# Supplementary material for: Endoplasmic reticulum stress in adipose tissue augments lipolysis
Source: PubMed Central journal article supplement (PMC4288352; doi:10.1111/jcmm.12384), 2014-11-08
Supplement: jcmm0019-0082-sd5.pdf [file jcmm0019-0082-sd5.pdf]

# Supplementary Figure 5

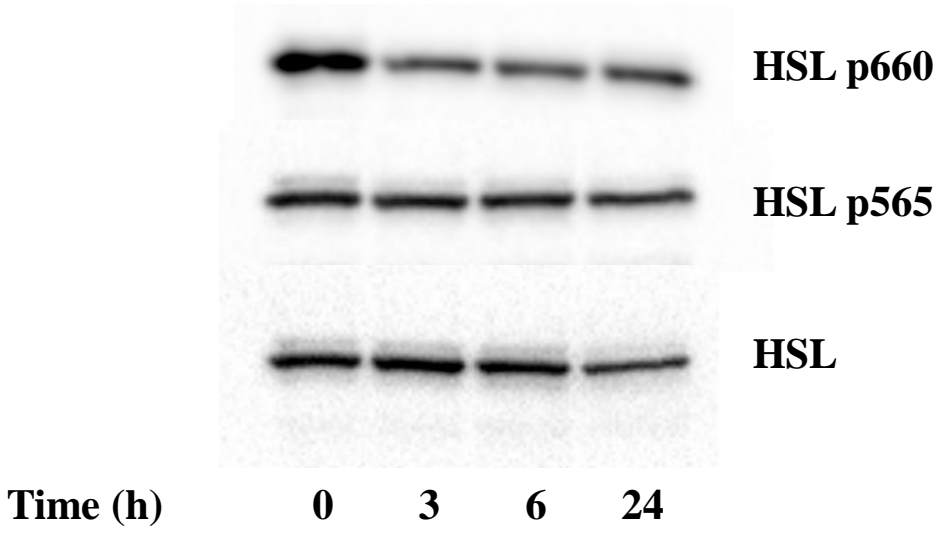

**Supplementary Figure 5:** Epididymal fat pads were dissected from male Balb/c mice at the indicated times after tunicamycin injection. The tissues were homogenized and equal amounts of protein resolved by SDS-PAGE followed by immunoblotting using antibodies recognizing the indicated proteins.
