# Supplementary material for: Endoplasmic reticulum stress in adipose tissue augments lipolysis
Source: PubMed Central journal article supplement (PMC4288352; doi:10.1111/jcmm.12384), 2014-11-08
Supplement: jcmm0019-0082-sd6.pdf [file jcmm0019-0082-sd6.pdf]

# Supplementary Figure 6

**A**

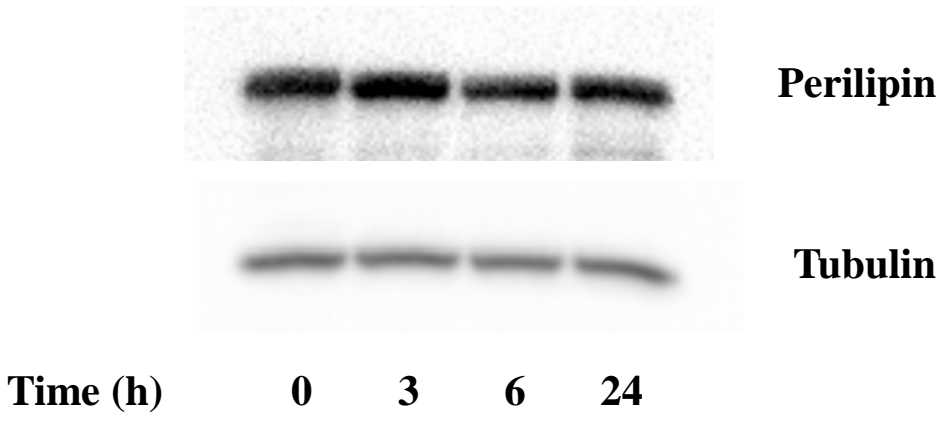

**B**

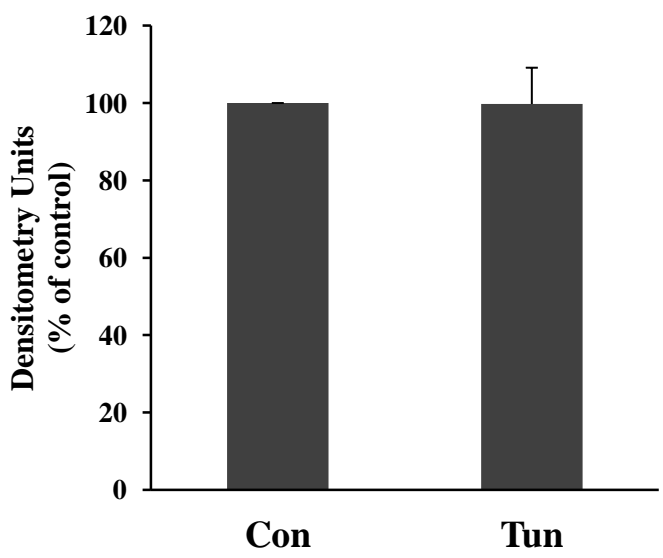

**Supplementary Figure 6:** (A) Epididymal fat pads were dissected from male Balb/c mice at the indicated times after tunicamycin injection. The tissues were lysed and equal amounts of protein resolved by SDS-PAGE followed by immunoblotting using antibodies recognizing the indicated proteins. (B) The intensities of the perilipin bands were quantified by densitometry. Graph represents mean±SD of values obtained at 24 h post injection, n=4.
