# Supplementary material for: Endoplasmic reticulum stress in adipose tissue augments lipolysis
Source: PubMed Central journal article supplement (PMC4288352; doi:10.1111/jcmm.12384), 2014-11-08
Supplement: jcmm0019-0082-sd7.pdf [file jcmm0019-0082-sd7.pdf]

# Supplementary Figure 7

**A**

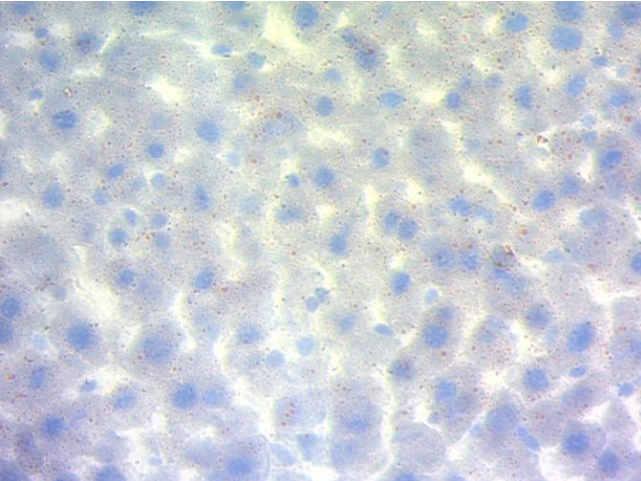

**B**

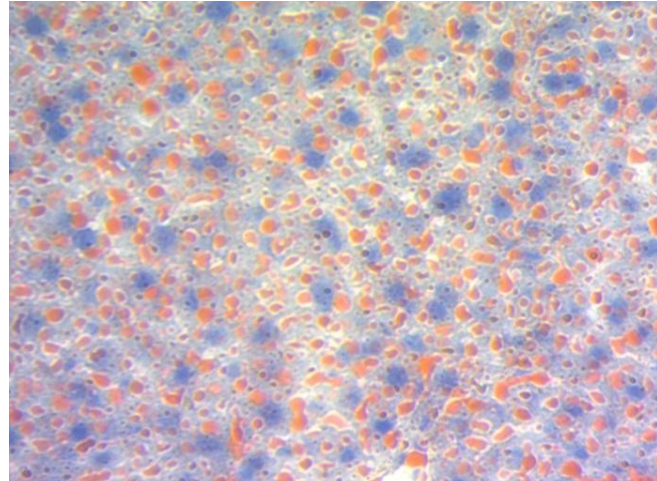

**C**

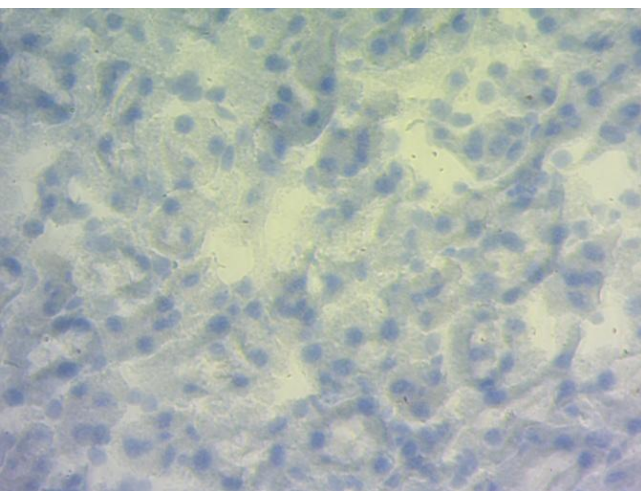

**D**

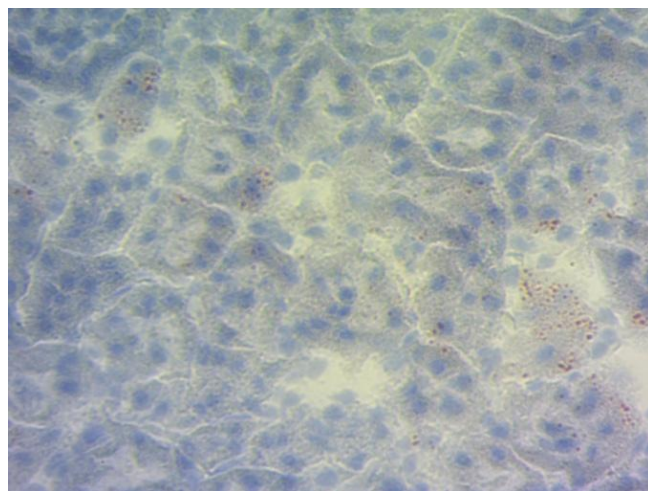

**Supplementary Figure 7:** Male Balb/c mice were injected intraperitoneally with either control buffer or tunicamycin. After 24 h, the liver and kidney were fixed and stained with Oil Red O and hematoxylin to visualize lipids (red) and nuclei (blue) respectively. (A) Control liver, (B) Tunicamycin treated liver, (C) Control kidney, (D) Tunicamycin treated kidney. Objective = 20x, n=5.
