# Supplementary material for: Endoplasmic reticulum stress in adipose tissue augments lipolysis
Source: PubMed Central journal article supplement (PMC4288352; doi:10.1111/jcmm.12384), 2014-11-08
Supplement: jcmm0019-0082-sd8.pdf [file jcmm0019-0082-sd8.pdf]

# Supplementary Figure 8

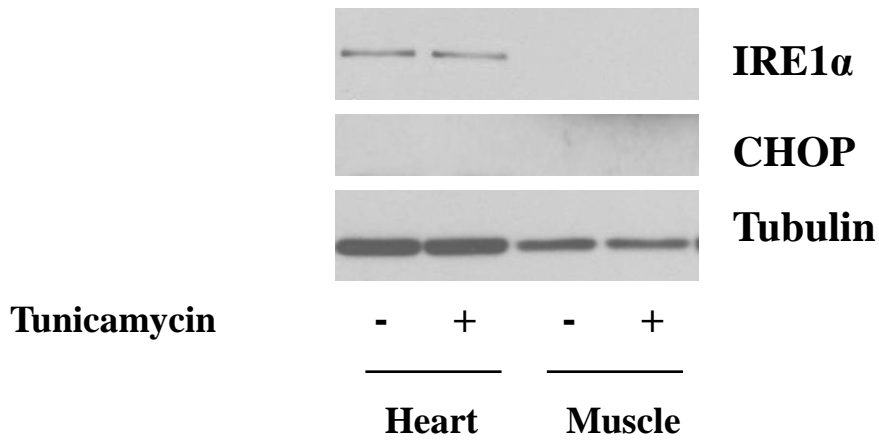

**Supplementary Figure 8:** Male Balb/c mice were injected with either control buffer or tunicamycin. After 24 h, the gastrocnemius and heart were dissected and homogenized. Equal amounts of protein were resolved by SDS-PAGE and immunoblotted using antibodies recognizing IRE1 $\alpha$ , CHOP or alpha/beta tubulin. Proteins were visualized using enhanced chemiluminescence.
