# Supplementary material for: Endoplasmic reticulum stress in adipose tissue augments lipolysis
Source: PubMed Central journal article supplement (PMC4288352; doi:10.1111/jcmm.12384), 2014-11-08
Supplement: jcmm0019-0082-sd10.pdf [file jcmm0019-0082-sd10.pdf]

# Supplementary Figure 10

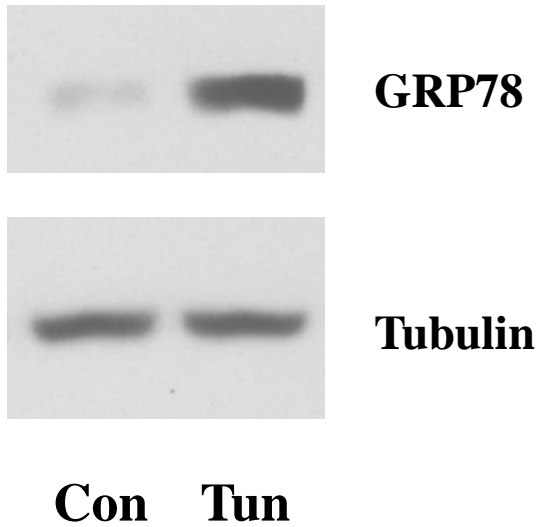

**Supplementary Figure 10:** Human adipocytes were isolated from a 48 year old female patient undergoing elective surgery and incubated with tunicamycin (5 $\mu$ g/ml) for 18 h at 37°C. The cells were lysed and equal amounts of protein resolved by SDS-PAGE followed by immunoblotting using antibodies recognizing GRP78 or alpha/beta tubulin.
