# Supplementary material for: Endoplasmic reticulum stress in adipose tissue augments lipolysis
Source: PubMed Central journal article supplement (PMC4288352; doi:10.1111/jcmm.12384), 2014-11-08
Supplement: jcmm0019-0082-sd11.pdf [file jcmm0019-0082-sd11.pdf]

**Supplementary Table 1: Primer Sequences**

| <b>Gene</b><br><b>m=mouse, h=human</b> | <b>Primer Sequences</b><br>Forward primer<br>Reverse primer |
|----------------------------------------|-------------------------------------------------------------|
| <i>mIre1a</i>                          | 5'GACCGGCAGTTCCAGTACAT3'<br>5'TTGAGAGAATGCAGGTGTGC3'        |
| <i>mPerk</i>                           | 5'CCGATGTCAGTGACAACAGCTG3'<br>5'AAGACAACGCCAAAGCCACCAC3'    |
| <i>mAtf6</i>                           | 5'GTCCAAAGCGAAGAGCTGTCTG3'<br>5'AGAGATGCCTCCTCTGATTGGC3'    |
| <i>mGrp78</i>                          | 5'TGTCTTCTCAGCATCAAGCAAGG3'<br>5'CCAACACTTCCTGGACAGGCTT3'   |
| <i>mAtf4</i>                           | 5'TCCTGAACAGCGAAGTGTTG3'<br>5'ACCCATGAGGTTTCAAGTGC3'        |
| <i>mSrebp-1c</i>                       | 5'GCAGCCACCATCTAGCCTG3'<br>5'CAGCAGTGAGTCTGCCTTGAT3'        |
| <i>mGrp94</i>                          | 5'CTCACAGAGCCTGTGGATGA3'<br>5'TCTCTGTTGCTTCCCGACTT3'        |
| <i>mPdia3</i>                          | 5'GAGGCTTGCCCCTGAGTATG3'<br>5'GTTGGCAGTGCAATCCACC3'         |
| <i>mDnajb9</i>                         | 5'ATAAAAGCCCTGATGCTGAAGC3'<br>5'GCCATTGGTAAAAGCACTGTGT3'    |
| <i>mChop</i>                           | 5'CAGGGTCAAGAGTAGTGAAGGT3'<br>5'CTGGAAGCCTGGTATGAGGAT3'     |
| <i>mXbp1s</i>                          | 5'GAGTCCGCAGCAGGTG3'<br>5'GTGTCAGAGTCCATGGGA3'              |
| <i>18S rRNA</i>                        | 5' GTAACCCGTTGAACCCATT3'<br>5' CCATCCAATCGGTAGTAGCG3'       |
| <i>hGRP94</i>                          | 5'CTGGGTCCAGCAGAAAAGAG3'<br>5'CTGGAACCTCTTCCCATCAA3'        |
| <i>hATF4</i>                           | 5'CCAACAACAGCAAGGAGGAT3'<br>5'GTGTCATCCAACGTGGTCAG3'        |
| <i>hGRP78</i>                          | 5'GCCGGCCAAGACAGCACAGA3'<br>5'GGGTCAACAAGGCGCCACGAA3'       |
| <i>hXBP1s</i>                          | 5'GGGATGGATGCCCTGGTT3'<br>5'GCCTGCACCTGCTGCGGA3'            |
| <i>hDNAJB9</i>                         | 5'AGCGGCTACCTCCTGCCTG3'<br>5'GGAGCTGGCACGCACCCT3'           |
| <i>hCHOP</i>                           | 5'GCACCTCCCAGAGCCCTC3'<br>5'CCCGGGCTGGGGAATGAC3'            |
| <i>hPDIA3</i>                          | 5'TCCCAGGCCTACCCTGGTG3'<br>5'GCTCAGCTGCGTGGCAAG3'           |

|                                 |                                                           |
|---------------------------------|-----------------------------------------------------------|
| <i>hPERK</i>                    | 5'GTCCCAAGGCTTTGGAATCTGTC3'<br>5'CCTACCAAGACAGGAGTTCTGG3' |
| <i>hATF6</i>                    | 5'CAGACAGTACCAACGCTTATGCC3'<br>5'GCAGAACTCCAGGTGCTTGAAG3' |
| <i>hIRE1<math>\alpha</math></i> | 5'CCGAACGTGATCCGCTACTTCT3'<br>5'CGCAAAGTCCTTCTGCTCCACA3'  |
| <i>hIDH1</i>                    | 5'AAGGATGCTGCAGAAGCTATAA3'<br>5'CTTGAACCTCCTCAACCCTCTTC3' |
